# Supplementary material
Source: publisher figshare collection journal article supplement (https://springernature.figshare.com/articles/dataset/_/25101185)
Supplement: Supplementary file 1 [file 1]

## Sheet: Figure 1.a
	Tumor volume (mm3)
Days	BECN WT															BECN KO
9	0	28	16	7	16	8	0	0	9	0	23	25	26	4	14	32	19	34	10	15	0	5	14
12	0	27	15	6	13	7	0	0	9	0	16	23	24	5	9	65	61	79	41	56	0	35	55
15	32	155	101	34	88	35	0	0	68	0	105	110	146	33	86	275	265	359	128	200	124	124	139
19	54	424	258	91	249	106	0	35	136	35	276	280	361	82	173	444	404	823	234	334	177	219	322
22	151	752	486	271	427	272	5	278	278	151	490	508	681	207	282	1134	1067	1196	644	1010	670	654	901
25	567	2498	1634	1080	1447	1102	252	340	1199	651	1998	2137	2242	797	1275	3933	3346	3001	2084	2402	2702	2046	2184
Tumor mass (g)
WT	BaKO
1.74	3.37
0.39	3.79
1.53	2.75
2.38	1.72
2.42	1.35
1.9	1.99
1.86	3.34
1.61	2.66
0.31
0.79
1.34
2.05
1.88
1.57
2.75

## Sheet: Figure 1.b
	Tumor volume (mm3)
Days	BECN WT																			BECN KO
7	18	0	18	18	6	0	18	13.5	13.5	18	22.5	18	13.5	6	13.5	13.5	32	32	6	40	18	18	40	40	32	40	13.5	40
10	143.087	6	92.4385	147.456	77.5	32	49.6	98.315	63.36	115.2	122.304	146.334	42.439	131.4	112.36	76.7295	68.77	210.983	116.614	202.8	98.696	185.679	87.814	142.97	113.724	343.188	85	195.352
13	506.88	75	363.096	270	347.612	75	221.812	534.528	530.604	485.002	409.248	451.25	228.939	515	347.612	330.672	278.663	695.75	402.04		316.224	550.427	744.673	392.673	760.266		278.663	974.902
16	827.544	111.012	612.521	606.88	531.609	93.312	526.746	748.503	1098.5	853.013	1090.76	771.75	440.896	839.788	640.452	596.759	636.263	1628.26	689.098		837.611	1321.4	1190.94	651.766	1185.48		690.971	1932.85
19	1318.91	262.4	1040.36	1062.5	882.941	136.93	556.325	874.64	1643.37	1245.82	1074.59	1095.12	755.212	1238.96	825.246	699.84	838.111	2798.98	1028.77		1238.33	1339.6	1632.81	1134.68	1938.09		1170.96	2510.01
		Tumor mass (g)
		WT	BaKO
		1.22	7.3
		2.7	3.05
		1.27	4.68
		1.64	3.02
		5.74	5.23
		1.2	6.2
		0.62	2.93
		1.86	8.91
			6.45
			3.68

## Sheet: Figure 1.c
	Tumor volume (mm3)
Days	WT																KO
17	30.6545	0	0	0	0	0	0	0	0	0	0	0	0				10.53	15.3663	5.9875	0	50	10.8	0	0	6.5348	17.1779	0.4	20.1136	119.795	34.25	10.664	141.225
18	49.419	0	0	0	0	0	0.05	0	0	0	0	0	12.5	16.8602	0.9	0	37.7825	19.4608	6	1.35	125.6	16.9	0	0	6.5348	17.1779	0.4	20.1136	119.795	34.25	10.664	141.225
19	107.696	0	0	0	0	0	0.05	0	0	6.4	0	0	62.4	31.4402	1.35	0	108.078	52.0994	45.4765	1.35	254.9	57.1	1.4	26.6	9.18	58.085	20.1756	26.325	198.929	93.2541	92.9929	329.025
20	176.963	0	3.698	0	0	11.1825	9.9944	1.4	12.7	78.4	4.6	1.4	120.8	82.5951	7.45	0.4	188.448	76.0589	68.844	18.1494	560.9	179	31.2	68.4	20.9	107.472	24.9193	61.381	217.55	117.604	129.723	312.457
21	272.089	0	3.698	15.6756	23.9549	41.5275	18.0989	33.7	21.3	91	2.7	29.7	225.2	91.8451	13.6	0.4	581.06	367.07	484.428	29.5204	560.9	314.7	44.3	130.5	27.9693	168.338	32.5192	95.2	278.207	180.82	235.85	371.3
22	321.673	0	13.85	27.6848	88.8008	96.672	37.7856	59.2	29.7	234.8	14	32.9	377.7	97.9888	29.7	0.8	581.06	367.07	484.428	29.5204	560.9	410.6	52.6	133.7	29.3693	194.581	40.1305	134.53	307.577	251.938	238.185	416.95
23	311.255	9.6	33.94	34.0359	145.231	101.228	84.1857	60.7	18.4	296.3	15.4	36.1	520.4	154.316		1.2	581.06	393.829	654.647	60.9989	560.9	421.2	57.1	327.6	41.104	453.749	132.848	371.322	501.615	766.814	806.626
24	311.25	44.115	102.981	178.095	201.379	158.634	190.087	129.5	58.9	325.6	29.6	47.5	810.1	243.831	0	19.7834
25	311.25	197.053	206.629	311.611	269.132	202.918	192.787	202.7	88.5	394.1	44.9	97.6	852.8			59.8946
Days	PyBa WT																PyBa KO
17	10	0	0				0	0	0	0	0	0	0	0	0	0	10	10	10	0	0	0	0	0
18	10	10	0				10	0	0	10	0	0	20	20	10	0	30	20	10	10	10	10	0	0	10	30	10	20	80	40	40	30
19	20	10	0				10	0	0	20	0	0	20	30	10	0	40	40	30	10	30	20	0	0	10	40	20	40	50	60	70	50
20	10	20	10			20	10	10	10	20	20	10	20	50	50	10	40	50	40	20	30	40	10	20	30	70	30	70	70	70	80	90
21	10	10	10	20	30	30	10	40	30	40	20	10	30	80	80	10	70	60	70	30	30	50	70	40	70	80	40	70	70	70	80	100
22	30	30	30	20	30	30	10	50	30	40	40	20	40	80	90	20	70	60	70	30	30	60	70	50	70	80	60	70	80	70	70	100
23	30	40	40	20	40	40	10	50	30	60	50	30	40	80		30	70	70	70	30	30	60	70	50	70	80	60	70	90	70	90	100
24	30	60	60	50	60	40	30	50	30	60	60	30	50	80		40
25	30	70	80	60	70	40	50	50	30	60	70	20	50

## Sheet: Figure 1.d
Tumor mass (g)
WT	KO
0.955	1.17167
0.401	1.09
0.402	1.15
0.782222	1.43625
0.413	1.50143
1.185	1.27556
1.3556
0.697143
1.03375
0.928571

## Sheet: Figure 1.e
size	WT													KO
1 mm	23.3333	0.666667	59.3333	6.33333	1.66667	1	12	8	18	15.3	6	7.7	5.7	6.66667	1.66667	6	0	83	71.7	86	3.7
2 mm	4.66667	0	38.3333	3	0.333333	0	2	0	0	0	0	0	2	1.66667	0	1	0	37.6667	49.3	34.3	1
>5 mm	0	0	0	0	0	0	0	0	0	0	0	0	0	2	0	2	0	1.66667	2.7	2	0
	WT													KO
1 mm	23.3333	0.666667	59.3333	6.33333	1.66667	1	12	8	18	15.3	6	7.7	5.7	6.66667	1.66667	6	0	83	71.7	86	3.7
2 mm	4.66667	0	38.3333	3	0.333333	0	2	0	0	0	0	0	2	1.66667	0	1	0	37.6667	49.3	34.3	1
>5 mm	0	0	0	0	0	0	0	0	0	0	0	0	0	2	0	2	0	1.66667	2.7	2	0

## Sheet: Figure 1.f
Weeks	WT	KO
24	1
25	1
29	1
29	1
32	1
26	1
33	1
33	1
28	1
27	1
28	1
25		1
25		1
22		1
25		1
25		1
27		1
27	1
27	1
23		1
26		1

## Sheet: Figure 1.i
	WT 2x105				WT 5x104				WT 1x104				KO 2x105				KO 5x104				KO 1x104
Days	0	0	0	0	0	0	0		0	0	0		0	0	0		0	0	0	0	0	0	0
26	96.228	0	124.2	4	102.602	4	123.008		63.7875	26.624	183.75		70.262	103.243	146.853		106.171	113.432	13.5	103.968	20.25	18	169.984
28	155.648	13.5	153.76	13.5	190.782	61.952	142.228		109.33	109.651	237.16		139.606	123.75	424.128		288.041	238.713	90.1125	237.568	62.5	107.892	374.666
31	321.512	32.8	301.806	62.5	285.948	116.614	355.743		181.804	169.016	402.178		219.6	267.05	605.696		310.005	328.509	224.325	275.2	97.216	128.993	386.538
33	410.504	51.772	303.75	145.762	404.942	178.024	329.122		336.96	217.728	400.95		448	304.2	618.246		482.23	499.23	306.56	291.964	143.748	270	487.872
36	603.432	44.5465	525.742		473.984	189.486	485.002		386.992	282.123	441.8		445.28	488.668	1230.19		640.452	647.496	529.2		141.312	497.448	674.16
39	562.432	103.518	609.854		346.8	242.47	594.88		649.8	457.056	441.8		798.6	647.149	1306.8		832.832	710.572	645.028		318.028	500.938	674.16
Final mass (g)
WT 1x104	KO 1x104	WT 5x104	KO 5x104	WT 2x105	KO 2x105
0.12	0.64	0.33	0.63	0.75	0.86
0.68	0.53	0.63	0.65	0.21	0.79
0.64	0.86	0.53	1	0.56	1.24
				0.19	0.91

## Sheet: Figure 2.a
	NES
ALLOGRAFT_REJECTION	-2.76493
TNFA_SIGNALING_VIA_NFKB	-2.57809
INFLAMMATORY_RESPONSE	-2.04273
EPITHELIAL_MESENCHYMAL_TRANSITION	-1.58062
IL6_JAK_STAT3_SIGNALING	-1.56543
KRAS_SIGNALING_UP	-1.56207
INTERFERON_GAMMA_RESPONSE	-1.4447
ESTROGEN_RESPONSE_EARLY	1.45178
ESTROGEN_RESPONSE_LATE	1.56198
APICAL_JUNCTION	1.56833
INTERFERON_ALPHA_RESPONSE	1.59908
APOPTOSIS	1.67856
P53_PATHWAY	1.71103
COMPLEMENT	1.73422
IL2_STAT5_SIGNALING	1.75396
COAGULATION	1.75712
HYPOXIA	1.8068
SPERMATOGENESIS	1.81767
PEROXISOME	1.83092
CHOLESTEROL_HOMEOSTASIS	1.92957
BILE_ACID_METABOLISM	2.04889
FATTY_ACID_METABOLISM	2.14329
OXIDATIVE_PHOSPHORYLATION	2.15114
ADIPOGENESIS	2.21515

## Sheet: Figure 2.b
Genes	Relative expression
	WT			BaKO
BECN1	1	1	1	0.281458	0.273353	0.270157
TNFα	0.72323	0.82779	0.660932	7.76471	7.07945	6.5757
IFNγ	0.782754	1.24347	0.887032	22.1978	22.3336	22.0408
MMP2	0.965101	1.21788	1.10909	1.73527	1.70032	1.65465
MMP9	0.658812	0.986022	0.971314	15.3314	14.2156	16.5443
IL6	1.15018	1.0373	1.05895	11.3149	9.01075	10.5726
IL17α	1	1	1	3.29242	8.23755	12.9548
MCP1	0.895937	0.914617	0.932788	4.17908	4.31525	4.17577

## Sheet: Figure 2.c
Concentration (ng/ml)
WT	WT+LPS	KO
0.035978	0.059431	0.079205
0.054588	0.067761	0.076864
0.045951	0.072197	0.085464

[truncated: 61 more sheets: Figure 2.d, Figure 2.e, Figure 2.f, Figure 2.g, Figure 2.i, Figure 2.j, Figure 3.b, Figure 3.d, Figure 3.f, Figure 4.b, Figure 4.c, Figure 4.d, Figure 4.e, Figure 4.f, Figure 5.h, Figure 6.b, Figure 6.c, Figure 6.d, Figure 6.e, Figure 6.f …]
